# Supplementary material for: Experimental co-transmission of Simian Immunodeficiency Virus (SIV) and the macaque homologs of the Kaposi Sarcoma-Associated Herpesvirus (KSHV) and Epstein-Barr Virus (EBV)
Source: PubMed Central journal article supplement (PMC6239284; doi:10.1371/journal.pone.0205632), 2018-11-16

S1 Fig. RV1 qPCR assay with comparison to sequenced PCR products

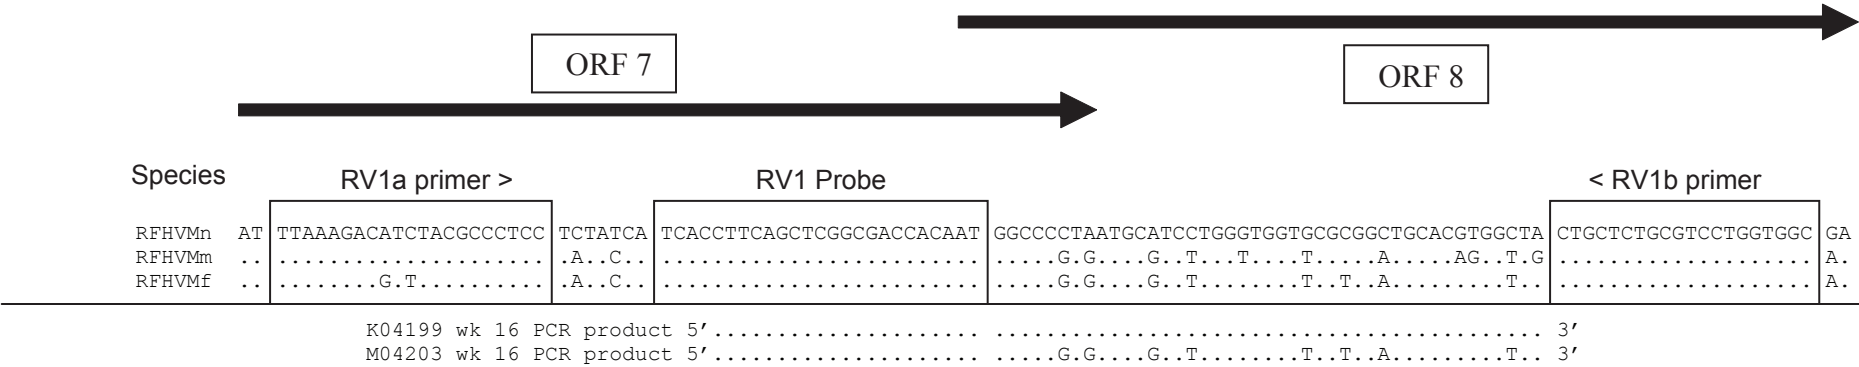

Supplement: pone.0205632.s001.pdf [file pone.0205632.s001.pdf]
